# Supplementary material for: Characterization of Negative Feedback Network Motifs in the TGF-β Signaling Pathway
Source: PubMed Central journal article supplement (PMC3875243; doi:10.1371/journal.pone.0083531), 2013-12-20
Supplement: pone.0083531.s001.pdf [file pone.0083531.s001.pdf]

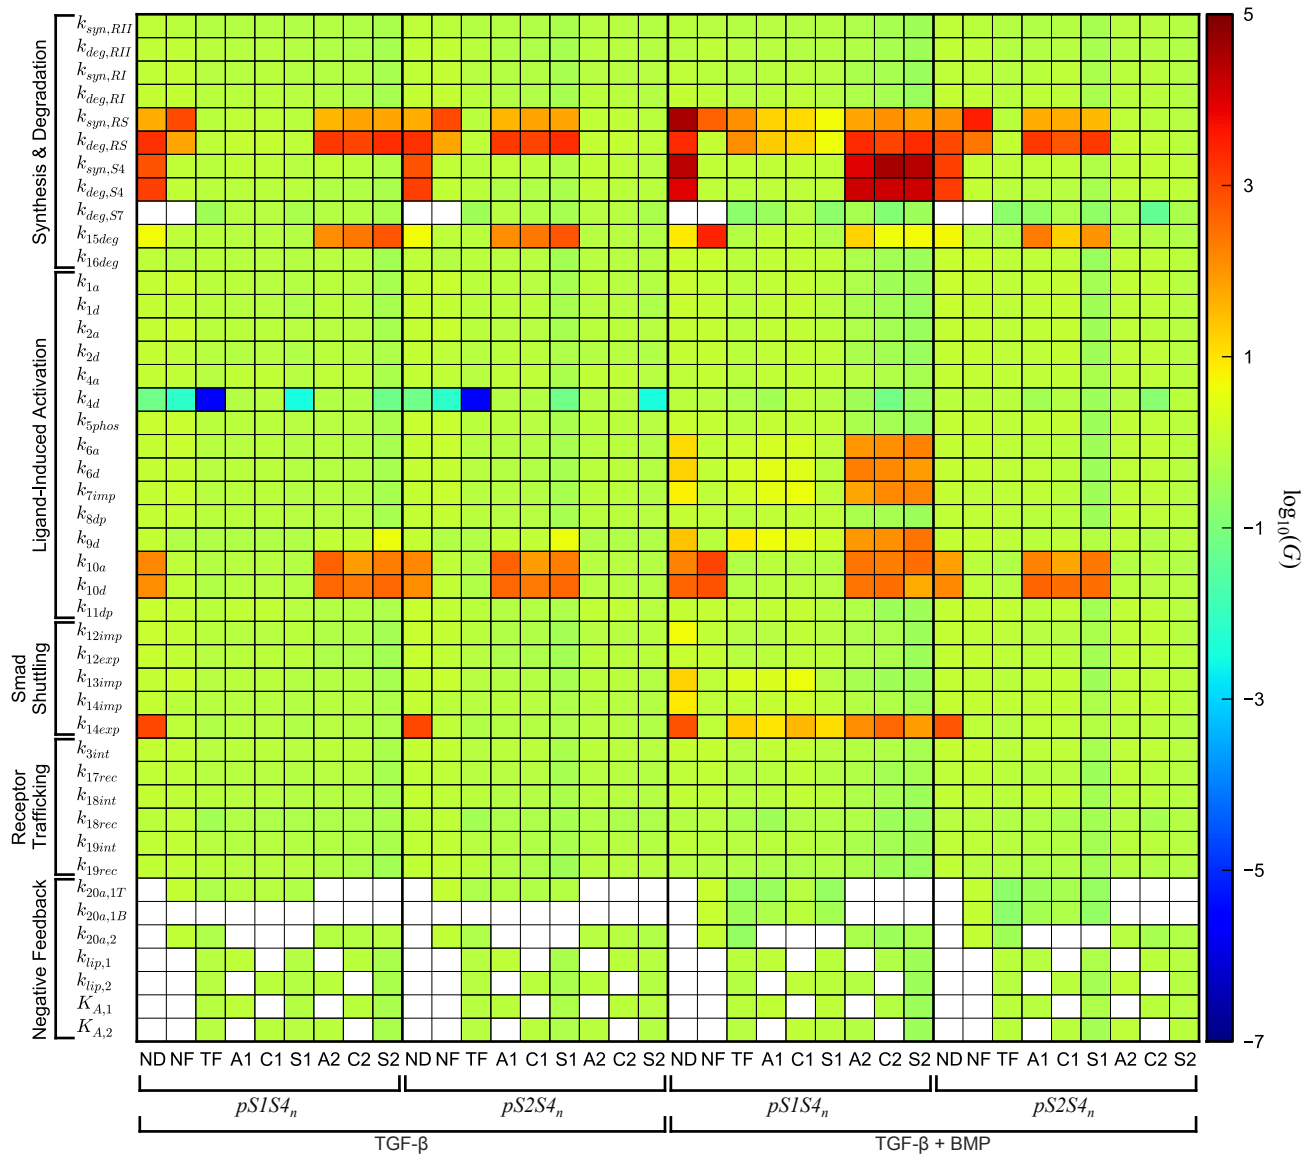

Figure S1
